# Supplementary material for: Modal variety of microsatellite instability in human endometrial carcinomas
Source: Springer Nature journal article supplement (doi:10.1007/s00432-015-2030-2), 2015-08-22
Supplement: MOESM1 [file 8520394]

**Supplementary Table** Frequencies of MSI in endometrial cancer: a survey of the literature

| Author                     | Year | Setting           | Organ                          | Subtype                                                 | No. of patients | Marker |                                 | Method for detection | MSI <sup>1</sup>             |                  |                  |                 | Correlation with MSI |                                                        |
|----------------------------|------|-------------------|--------------------------------|---------------------------------------------------------|-----------------|--------|---------------------------------|----------------------|------------------------------|------------------|------------------|-----------------|----------------------|--------------------------------------------------------|
|                            |      |                   |                                |                                                         |                 | No.    | Variety                         |                      | %MSI                         | %H <sup>2</sup>  | %L <sup>3</sup>  | Positive marker |                      |                                                        |
| Cote ML et al.             | 2012 | S <sup>4</sup>    | U <sup>5</sup>                 | E <sup>5</sup> (55)<br>others (21)                      | 76              | 10     | m <sup>7</sup> , d <sup>8</sup> | F <sup>9</sup>       | 18.2 (E)<br>4.8              |                  |                  |                 | m, d                 | grade, race                                            |
| Zauber NP et al.           | 2010 | S/F <sup>10</sup> | U                              | E (191)<br>others (22)                                  | 213             | 5      | m, d                            | F                    | 26.3                         | 26.3             | 0                |                 |                      | MLH1 meth <sup>11</sup>                                |
| Stewart CJ et al.          | 2010 | S                 | U                              | MELF <sup>12</sup> +/-                                  | 33              | 1      | m                               | F-SSCP <sup>13</sup> | 18.1                         | 18.1             | 0                |                 | m                    | -                                                      |
| Koyamatsu Y et al.         | 2010 | S                 | U                              | E                                                       | 30              | 11     | m, d                            | F                    | 100                          | 33.3             | 66.7             |                 |                      | gene exp <sup>14</sup>                                 |
| Mackay H et al.            | 2010 | S                 | U                              | E (131)<br>others (32)                                  | 166             | 2      | d                               |                      | 19.3                         | 19.3             | 0                |                 | d                    | histol <sup>15</sup> , DFS <sup>16</sup>               |
| Murayama-Hosokawa S et al. | 2010 | S                 | U                              | E                                                       | 42              | 5      | m, d                            | F                    | 23.8                         | 23.8             | 0                |                 |                      | -                                                      |
| Alves F et al.             | 2010 | S                 | U                              | E                                                       | 19              | 7      | d                               | F                    | 10.5                         | 10.5             | 0                |                 | d                    | -                                                      |
| Bilbao C et al.            | 2010 | S                 | U                              | E                                                       | 93              | 5      | m                               | F                    | 22                           | 22               | 0                |                 | m                    | stage, v inv <sup>17</sup> ,<br>DFS, DSS <sup>18</sup> |
| Kawaguchi M et al.         | 2009 | S                 | U                              | E (59)<br>AS <sup>19</sup> (10)                         | 69              | 5      | m, d                            | F                    | 31.9                         | 31.9             | 0                |                 |                      | -                                                      |
| Kawaguchi M et al.         | 2009 | S                 | U                              | E (37)<br>AS (7)                                        | 44              | 11     | m, d                            | F                    | 38.6                         | 31.8             | 6.8              |                 |                      | MLH1 meth                                              |
| Ferreira AM et al.         | 2009 | F                 | U                              | E                                                       | 61              | 6      | m, d                            | F                    | 69                           | 40               | 29               |                 |                      | -                                                      |
| Turbiner J et al.          | 2008 | S                 | U (Tam <sup>20</sup> +)        | E (17)<br>C <sup>21</sup> (1)                           | 18              | 2      | m                               | F                    | 5.6                          | 5.6              | 0                |                 | m                    | -                                                      |
|                            |      |                   | U (Tam -)                      | E (22)<br>CS <sup>22</sup> (1)                          | 23              |        |                                 |                      | 34.8                         | 34.8             | 0                |                 |                      | -                                                      |
| Sobczuk A et al.           | 2007 | S                 | U                              | E                                                       | 60              | 5      | m, d                            | S <sup>23</sup>      | 35                           | 23               | 12               |                 |                      | grade                                                  |
| Zigheboim I et al.         | 2007 | S                 | U                              | E                                                       | 446             | 5      | m, d                            | R <sup>24</sup>      | 33                           | 33               | 0                |                 |                      | grade                                                  |
| Westin SN et al.           | 2008 | S/F               | U (lower seg)                  | E (27)<br>others (8)                                    | 35              | 6      | m, d                            | F                    | 34.3                         | 34.3             | 0                |                 |                      | -                                                      |
| Konopka B et al.           | 2007 | S                 | U                              | E                                                       | 56              | 9      | m, d                            | F                    | 46.5                         | 28.6             | 17.9             |                 |                      | -                                                      |
| McCourt CK et al.          | 2007 | S                 | U                              | E (376)<br>others (69)<br>sarcoma (28)                  | 473             | 5      | m, d                            | R                    | 32 (E)<br>10<br>21 (sarcoma) | 32<br>10<br>21   | 0<br>0<br>0      |                 |                      | BMI <sup>25</sup> , race, grade,<br>histol             |
| Ju W et al.                | 2006 | S                 | U                              | E                                                       | 50              | 5      | m, d                            | F                    | 24                           | 24               | 0                |                 |                      | MSH2/MLH1 exp                                          |
| Taylor NP et al.           | 2006 | S                 | U                              | CS                                                      | 28              | 5      | m, d                            | R                    | 17.9 - 21.4                  | 17.9 - 21.4      | 0                |                 |                      | TP53 loss, TP53 exp                                    |
| Honore LH et al.           | 2006 | S                 | U                              | E                                                       | 218             | 1      | m                               | F                    | 16.1                         | 16.1             | 0                |                 | m                    | grade etc                                              |
| Furlan D et al.            | 2006 | S                 | synchronous O <sup>26</sup> +U | E                                                       | 13              | 5      | m                               | F                    | 38.5                         | 38.5             | 0                |                 | m                    | MLH1 meth                                              |
| Kang S et al.              | 2006 | S                 | U                              | E                                                       | 75              | 6      | m, d                            |                      | 20                           | 20               | 0                |                 |                      | MLH1, RASSF1A meth                                     |
| Shibata D et al.           | 2006 | S                 | U                              | E                                                       | 80              | 5      | m, d                            | F                    | 35                           | 25               | 10               |                 |                      | RAB32 meth                                             |
| Black D et al.             | 2006 | S                 | U                              | E (379)<br>S <sup>27</sup> (71)<br>C (18)<br>others (5) | 473             | 5      | m, d                            | R                    | 20                           | 20               | 0                |                 |                      | DFS, DSS                                               |
| Bilbao C et al.            | 2006 | S                 | U                              | E (182)                                                 | 205             | 3      | m                               | R                    | 20                           | 20               | 0                |                 | m                    | PTEN mt <sup>28</sup>                                  |
| Chang K-H et al.           | 2006 | S                 | bilat O<br>synchronous O+U     | E                                                       | 12<br>4         | 4      | m, d                            | F                    | 67 (O), 75 (U)               | 33 (O), 75 (U)   | 33 (O), 0 (U)    |                 | m, d                 | -                                                      |
| Irving JA et al.           | 2005 | S                 | synchronous O+U                | E                                                       | 12              | 5      | m, d                            | F                    | 58 (O), 67 (U)               | 50 (O), 58 (U)   | 8(O), 8 (U)      |                 |                      | -                                                      |
| Risinger JI et al.         | 2005 | S                 | U                              | E                                                       | 24              | 5      | m, d                            | F                    | 37.5                         | 37.5             | 0                |                 |                      | exp array profiles                                     |
| Kaneki E et al.            | 2004 | S                 | synchronous O+U                | E                                                       | 17              | 5      | d                               | F                    | 64.7 (O), 58.8 (U)           | 35.3(O), 35.3(U) | 29.4(O), 23.5(U) |                 | d                    | -                                                      |
| Prasad M et al.            | 2005 | S                 | U                              | E (23)<br>MMMT <sup>29</sup> (3)<br>S (3)               | 29              | 7      |                                 | R                    | 24.1 - 27.6                  |                  |                  |                 |                      | -                                                      |
| Pijnenborg JMA et al.      | 2004 | S                 | U                              | E                                                       | 88              | 2      | m                               | F                    | 14.8                         | 14.8             | 0                |                 | m                    | MLH1 exp                                               |

|                       |      |   |                      |                                                                                    |         |    |                          |                     |                                       |                       |                  |           |                                                               |
|-----------------------|------|---|----------------------|------------------------------------------------------------------------------------|---------|----|--------------------------|---------------------|---------------------------------------|-----------------------|------------------|-----------|---------------------------------------------------------------|
| An HJ et al.          | 2004 | S | U                    | C                                                                                  | 14      | 8  | m, d                     | R                   | 21.4                                  | 21.4                  | 0                | m, d      | -                                                             |
| Hirasawa A et al.     | 2003 | S | U                    | E                                                                                  | 43      | 11 | m, d                     | F                   | 27.9                                  | 27.9                  | 0                |           | stage, grade, my inv <sup>30</sup><br>N meta <sup>31</sup>    |
| Hardisson D et al.    | 2003 | S | U                    | E (52)<br>Non E (26)<br>HP <sup>32</sup> (7)<br>E (67)<br>AS (9)<br>C (3)<br>S (2) | 85      | 2  | m                        | F                   | 38.5 (E)<br>11.5 (Non E)<br>28.6 (HP) | 38.5<br>11.5<br>28.6  | 0<br>0<br>0      | m         | histol,<br>MLH1/MSH2 exp                                      |
| Miturski R et al.     | 2003 | S | U                    | E (92)<br>others (33)                                                              | 81      | 1  | m                        | S                   | 23.9                                  |                       |                  | m         | -                                                             |
| Moreno-Bueno G et al. | 2002 | S | U                    | E (67)<br>Adenoca (13)<br>S (6)<br>E (97)                                          | 125     | 2  | m                        | F                   | 29.3 (E)<br>6.1                       | 29.3<br>6.1           | 0<br>0           | m         | histol                                                        |
| Ferrandina G et al.   | 2002 | S | U                    | E                                                                                  | 47      | 6  | m, d                     | South <sup>33</sup> | 25.3                                  |                       |                  |           | histol                                                        |
| Muresu R et al.       | 2002 | S | U                    | E (67)<br>Adenoca (13)<br>S (6)<br>E (97)                                          | 74      | 5  | m, d                     | F                   | 32                                    |                       |                  |           | stage, grade                                                  |
| Baldinu P et al.      | 2002 | S | U                    | E (48)<br>others (5)                                                               | 116     | 5  | m, d                     | F                   | 34                                    | 34                    | 0                | m, d      | stage, grade                                                  |
| Koul A et al.         | 2002 | S | U                    | E (76)                                                                             | 53      | 6  | m, d                     | R                   | 20.8 (E)<br>20                        |                       |                  | m, d      | <i>PTEN</i> mt                                                |
| Peiro G et al.        | 2002 | S | U                    | E (59)                                                                             | 89      | 5  | m, d                     | F                   | 11                                    | 11                    | 9                |           | stage,<br>MSH2/MLH1 exp                                       |
| Machin P et al.       | 2002 | S | U                    | E                                                                                  | 73      | 5  | m, d                     | South               | 26                                    |                       |                  |           | -                                                             |
| Ohwada M et al.       | 2002 | S | U                    | E                                                                                  | 66      | 5  | d                        | South               | 40.9                                  | 40.9                  | 0                | d         | -                                                             |
| Watanabe Y et al.     | 2001 | S | U                    | E                                                                                  | 46      | 7  | m, d                     | R                   | 17.4                                  |                       |                  |           | T loc <sup>34</sup>                                           |
| Moreno-Bueno G et al. | 2001 | S | O<br>synchronous O+U | E                                                                                  | 26<br>4 | 2  | m                        | F                   | 19 (O)<br>100 (O), 100(U)             | 19<br>100 (O), 100(U) | 0<br>0           | m         | -                                                             |
| Toda T et al.         | 2001 | S | U                    | E                                                                                  | 60      | 8  | d                        | S                   | 30                                    | 16.7                  | 13.3             | d         | grade, stage<br>TP53 exp, <i>PTEN</i> mt,<br>OS <sup>35</sup> |
| Maxwell GL et al.     | 2001 | S | U                    | E                                                                                  | 131     | 3  | m, d, te <sup>35</sup>   | R                   | 22                                    | 22                    | 0                | m, d, te  | grade, OS                                                     |
| Fiumicino BS et al.   | 2001 | S | U                    | E (46)                                                                             | 65      | 6  | m, d                     | South               | 17                                    | 17                    | 0                | m, d      | <i>KRAS</i> mt                                                |
| Lagarda H et al.      | 2001 | S | U                    | E                                                                                  | 58      | 7  | m, d                     | South               | 24.1                                  | 24.1                  | 0                | m, d      | <i>PTEN</i> mt                                                |
| Salvesen HB et al.    | 2001 | S | U                    | E (173)<br>C (11)<br>S (10)                                                        | 110     | 5  | m, d                     | R                   | 32.7                                  | 32.7                  | 0                |           | race, stage<br>histol                                         |
| Basil JB et al.       | 2000 | S | U                    | E (73)                                                                             | 229     | 5  | m, d                     | R                   | 30.6                                  | 30.6                  | 0                |           | TP53 exp, histol                                              |
| Maxwell GL et al.     | 2000 | S | U                    | E (234)<br>C or S (25)                                                             | 100     | 3  | m, d, te                 | R                   | 15                                    | 15                    | 0                |           | -                                                             |
| MacDonald ND et al.   | 2000 | S | U                    | E (57)<br>S (34)                                                                   | 259     | 5  | m, d                     | R                   | 45                                    | 45                    | 0                | m, d      | histol                                                        |
| Lax SF et al.         | 2000 | S | U                    | E (93)                                                                             | 91      | 8  |                          |                     | 28 (E)<br>0 (S)                       |                       |                  |           | histol                                                        |
| Ohwada M et al.       | 1999 | S | U                    | E                                                                                  | 93      | 5  | d                        | South               | 34                                    | 24                    | 10               | d         | stage, N meta                                                 |
| Esteller M et al.     | 1999 | S | U                    | E (115)                                                                            | 27      | 6  | m, d                     | S                   | 44                                    |                       |                  | m, d      | <i>MLH1</i> meth                                              |
| Risinger JI et al.    | 1998 | S | U                    | E (33)                                                                             | 136     | 3  | m, d, te                 |                     | 23.5                                  | 23.5                  | 0                | m, d, te  | <i>PTEN</i> mt                                                |
| Catasus L et al.      | 1998 | S | U                    | E (21)                                                                             | 42      | 7  | d                        | South               | 28                                    | 28                    | 0                | d         | -                                                             |
| Catasus L et al.      | 1998 | S | U                    | E (64)<br>AS (5)<br>C (1)<br>CS (2)<br>E (80)<br>AS (12)<br>C (4)                  | 26      | 5  | d                        | South               | 50                                    | 50                    | 0                | d         | <i>BAX</i> mt                                                 |
| Sakamoto T et al.     | 1998 | S | U                    | E (73)                                                                             | 72      | 5  | d                        | S                   | 14 (E)<br>40 (AS)<br>0 (C)<br>0 (CS)  | 14<br>40<br>0<br>0    | 0<br>0<br>0<br>0 | d         | -                                                             |
| Kowalski LD et al.    | 1997 | S | U                    | S (34)                                                                             | 125     | 7  | d                        | R                   | 20                                    |                       |                  | d         | -                                                             |
| Tashiro H et al.      | 1997 | S | U                    | E                                                                                  | 34      | 8  | d                        | R                   | 8.8                                   | 0                     | 8.8              | d         | -                                                             |
| Mutter GL et al.      | 1996 | S | U                    | E                                                                                  | 31      | 11 | d                        | R                   | 26                                    |                       |                  | d         | -                                                             |
| Peiffer SL et al.     | 1995 | S |                      | S (6)<br>E (59)                                                                    | 37      | 39 | d, tr <sup>37</sup> , te | S                   | 22                                    | 11                    | 11               | d, tr, te | -                                                             |
| Katabuchi H et al.    | 1995 | S | U                    | E                                                                                  | 65      | 8  | d                        | R                   | 18.5                                  | 18.5                  | 0                | d         | -                                                             |

|                    |      |        |        |                          |     |    |   |   |                    |         |         |   |         |
|--------------------|------|--------|--------|--------------------------|-----|----|---|---|--------------------|---------|---------|---|---------|
| Kobayashi K et al. | 1995 | S      | O<br>U |                          | 145 | 5  | d | R | 9 (O)<br>54 (U)    | 3<br>23 | 6<br>31 | d | grade   |
| Duggan BD et al.   | 1994 | S      | U      | E (36)<br>C (2)<br>S (7) | 45  | 3  | d | R | 20                 | -       | -       | d | KRAS mt |
| Burks RT et al.    | 1994 | S      | U      | E (26)<br>S (4)          | 30  | 7  | d | R | 23.3               | 23.3    | 0       | d | -       |
| Risinger JI et al. | 1993 | S<br>F | U      |                          | 40  | 71 | d | R | 16.6 (S)<br>75 (F) |         |         | d | -       |

Abbreviations: <sup>1</sup>MSI = microsatellite instability; <sup>2</sup>H = MSI-high (H); <sup>3</sup>L = MSI-low (L); <sup>4</sup>S, sporadic; <sup>5</sup>U = uterus; <sup>6</sup>E = endometrioid; <sup>7</sup>m = mononucleotide; <sup>8</sup>d = dinucleotide; <sup>9</sup>F = fluorescent; <sup>10</sup>F = familial; <sup>11</sup>meth = promoter methylation; <sup>12</sup>MELF = formation of microcystic = elongated and fragmented glands; <sup>13</sup>SSCP = single-stranded DNA conformation polymorphism; <sup>14</sup>exp = expression; <sup>15</sup>histol = histology; <sup>16</sup>DFS = disease-free survival; <sup>17</sup>v inv = vascular invasion; <sup>18</sup>DSS = disease-specific survival; <sup>19</sup>AS = adenosquamous carcinoma; <sup>20</sup>Tam = tamoxifen; <sup>21</sup>C = clear cell carcinoma; <sup>22</sup>CS = carcinosarcoma; <sup>23</sup>S = silver staining; <sup>24</sup>R = radioisotope; <sup>25</sup>BMI = body mass index; <sup>26</sup>O = ovary; <sup>27</sup>S = serous carcinoma; <sup>28</sup>mt = mutation; <sup>29</sup>MMMT = malignant mixed Mullerian tumour; <sup>30</sup>my inv = myometrial invasion; <sup>31</sup>N meta = lymphnode metastasis; <sup>32</sup>HP = hyperplasia; <sup>33</sup>South = Southern blotting; <sup>34</sup>T loc = tumour location; <sup>35</sup>te = tetranucleotide; <sup>36</sup>OS = overall survival; <sup>37</sup>tr = trinucleotide

## References for Supplementary Table

- Alves M, Carreira I, Liberato P, Ramos S, Mafra M, Inverno AS, Maia AT, Martins AP, Brito M, and Monteiro C (2010) Identification of a 0.4 Kb deletion region in 10q26 associated with endometrial carcinoma. *Oncol Rep* 23(2): 519-522
- An HJ, Logani S, Isacson C, and Ellenson LH (2004) Molecular characterization of uterine clear cell carcinoma. *Mod Pathol* 17(5): 530-537
- Baldinu P, Cossu A, Manca A, Satta MP, Pisano M, Casula M, Dessole S, Pintus A, Tanda F, and Palmieri G (2002) Microsatellite instability and mutation analysis of candidate genes in unselected sardinian patients with endometrial carcinoma. *Cancer* 94(12): 3157-3168
- Basil JB, Goodfellow PJ, Rader JS, Mutch DG, and Herzog TJ (2000) Clinical significance of microsatellite instability in endometrial carcinoma. *Cancer* 89(8): 1758-1764
- Bilbao C, Lara PC, Ramirez R, Henriquez-Hernandez LA, Rodriguez G, Falcon O, Leon L, Perucho M, Diaz-Chico BN, and Diaz-Chico JC (2010) Microsatellite instability predicts clinical outcome in radiation-treated endometrioid endometrial cancer. *Int J Radiat Oncol Biol Phys* 76(1): 9-13
- Bilbao C, Rodriguez G, Ramirez R, Falcon O, Leon L, Chirino R, Rivero JF, Falcon O, Jr., Diaz-Chico BN, Diaz-Chico JC, et al (2006) The relationship between microsatellite instability and PTEN gene mutations in endometrial cancer. *Int J Cancer* 119(3): 563-570
- Black D, Soslow RA, Levine DA, Tornos C, Chen SC, Hummer AJ, Bogomolny F, Olvera N, Barakat RR, and Boyd J (2006) Clinicopathologic significance of defective DNA mismatch repair in endometrial carcinoma. *J Clin Oncol* 24(11): 1745-1753
- Burks RT, Kessis TD, Cho KR, and Hedrick L (1994) Microsatellite instability in endometrial carcinoma. *Oncogene* 9(4): 1163-1166
- Catusus L, Machin P, Matias-Guiu X, and Prat J (1998a) Microsatellite instability in endometrial carcinomas: clinicopathologic correlations in a series of 42 cases. *Hum Pathol* 29(10): 1160-1164
- Catusus L, Matias-Guiu X, Machin P, Munoz J, and Prat J (1998b) BAX somatic frameshift mutations in endometrioid adenocarcinomas of the endometrium: evidence for a tumor progression role in endometrial carcinomas with microsatellite instability. *Lab Invest* 78(11): 1439-1444
- Chang KH, Albarracin C, Luthra R, Wang L, Zheng W, Malpica A, Deavers MT, Silva EG, and Liu J (2006) Discordant genetic changes in ovarian and endometrial endometrioid carcinomas: a potential pitfall in molecular diagnosis. *Int J Gynecol Cancer* 16(1): 178-182
- Cote ML, Kam A, Chang CY, Raskin L, Reding KW, Cho KR, Gruber SB, and Ali-Fehmi R (2012) A pilot study of microsatellite instability and endometrial cancer survival in white and African American women. *Int J Gynecol Pathol* 31(1): 66-72
- Duggan BD, Felix JC, Muderspach LI, Tourgeman D, Zheng J, and Shibata D (1994) Microsatellite instability in sporadic endometrial carcinoma. *J Natl Cancer Inst* 86(16): 1216-1221

- Esteller M, Catusas L, Matias-Guiu X, Mutter GL, Prat J, Baylin SB, and Herman JG (1999) hMLH1 promoter hypermethylation is an early event in human endometrial tumorigenesis. *Am J Pathol* 155(5): 1767-1772
- Ferrandina G, Legge F, Ranelletti FO, Zannoni GF, Maggiano N, Evangelisti A, Mancuso S, Scambia G, and Lauriola L (2002) Cyclooxygenase-2 expression in endometrial carcinoma: correlation with clinicopathologic parameters and clinical outcome. *Cancer* 95(4): 801-807
- Ferreira AM, Westers H, Wu Y, Niessen RC, Olderode-Berends M, van der Sluis T, van der Zee AG, Hollema H, Kleibeuker JH, Sijmons RH, et al (2009) Do microsatellite instability profiles really differ between colorectal and endometrial tumors? *Genes Chromosomes Cancer* 48(7): 552-557
- Fiumicino S, Ercoli A, Ferrandina G, Hess P, Raspaglio G, Genuardi M, Rovella V, Bellacosa A, Cicchillitti L, Mancuso S, et al (2001) Microsatellite instability is an independent indicator of recurrence in sporadic stage I-II endometrial adenocarcinoma. *J Clin Oncol* 19(4): 1008-1014
- Furlan D, Carnevali I, Marcomini B, Cerutti R, Dainese E, Capella C, and Riva C (2006) The high frequency of de novo promoter methylation in synchronous primary endometrial and ovarian carcinomas. *Clin Cancer Res* 12(11 Pt 1): 3329-3336
- Hardisson D, Moreno-Bueno G, Sanchez L, Sarrío D, Suarez A, Calero F, and Palacios J (2003) Tissue microarray immunohistochemical expression analysis of mismatch repair (hMLH1 and hMSH2 genes) in endometrial carcinoma and atypical endometrial hyperplasia: relationship with microsatellite instability. *Mod Pathol* 16(11): 1148-1158
- Hirasawa A, Aoki D, Inoue J, Imoto I, Susumu N, Sugano K, Nozawa S, and Inazawa J (2003) Unfavorable prognostic factors associated with high frequency of microsatellite instability and comparative genomic hybridization analysis in endometrial cancer. *Clin Cancer Res* 9(15): 5675-5682
- Honore LH, Hanson J, and Andrew SE (2006) Microsatellite instability in endometrioid endometrial carcinoma: correlation with clinically relevant pathologic variables. *Int J Gynecol Cancer* 16(3): 1386-1392
- Irving JA, Catusas L, Gallardo A, Bussaglia E, Romero M, Matias-Guiu X, and Prat J (2005) Synchronous endometrioid carcinomas of the uterine corpus and ovary: alterations in the beta-catenin (CTNNB1) pathway are associated with independent primary tumors and favorable prognosis. *Hum Pathol* 36(6): 605-619
- Ju W, Park HM, Lee SN, Sung SH, and Kim SC (2006) Loss of hMLH1 expression is associated with less aggressive clinicopathological features in sporadic endometrioid endometrial adenocarcinoma. *J Obstet Gynaecol Res* 32(5): 454-460
- Kaneki E, Oda Y, Ohishi Y, Tamiya S, Oda S, Hirakawa T, Nakano H, and Tsuneyoshi M (2004) Frequent microsatellite instability in synchronous ovarian and endometrial adenocarcinoma and its usefulness for differential diagnosis. *Hum Pathol* 35(12): 1484-1493
- Kang S, Lee JM, Jeon ES, Lee S, Kim H, Kim HS, Seo SS, Park SY, Sidransky D, and Dong SM (2006) RASSF1A hypermethylation and its inverse correlation with BRAF and/or KRAS mutations in MSI-associated endometrial carcinoma. *Int J Cancer* 119(6): 1316-1321
- Katabuchi H, van Rees B, Lambers AR, Ronnett BM, Blazes MS, Leach FS, Cho KR, and Hedrick L (1995) Mutations

- in DNA mismatch repair genes are not responsible for microsatellite instability in most sporadic endometrial carcinomas. *Cancer Res* 55(23): 5556-5560
- Kawaguchi M, Banno K, Yanokura M, Kobayashi Y, Kishimi A, Ogawa S, Kisu I, Nomura H, Hirasawa A, Susumu N, et al (2009a) Analysis of candidate target genes for mononucleotide repeat mutation in microsatellite instability-high (MSI-H) endometrial cancer. *Int J Oncol* 35(5): 977-982
- Kawaguchi M, Yanokura M, Banno K, Kobayashi Y, Kuwabara Y, Kobayashi M, Nomura H, Hirasawa A, Susumu N, and Aoki D (2009b) Analysis of a correlation between the BRAF V600E mutation and abnormal DNA mismatch repair in patients with sporadic endometrial cancer. *Int J Oncol* 34(6): 1541-1547
- Kobayashi K, Sagae S, Kudo R, Saito H, Koi S, and Nakamura Y (1995) Microsatellite instability in endometrial carcinomas: frequent replication errors in tumors of early onset and/or of poorly differentiated type. *Genes Chromosomes Cancer* 14(2): 128-132
- Konopka B, Janiec-Jankowska A, Czupczak D, Paszko Z, Bidzinski M, Olszewski W, and Goluda C (2007) Molecular genetic defects in endometrial carcinomas: microsatellite instability, PTEN and beta-catenin (CTNNB1) genes mutations. *J Cancer Res Clin Oncol* 133(6): 361-371
- Koul A, Willen R, Bendahl PO, Nilbert M, and Borg A (2002) Distinct sets of gene alterations in endometrial carcinoma implicate alternate modes of tumorigenesis. *Cancer* 94(9): 2369-2379
- Kowalski LD, Mutch DG, Herzog TJ, Rader JS, and Goodfellow PJ (1997) Mutational analysis of MLH1 and MSH2 in 25 prospectively-acquired RER+ endometrial cancers. *Genes Chromosomes Cancer* 18(3): 219-227
- Koyamatsu Y, Sakamoto M, Miyake K, Muroya T, Sugano K, Nakao Y, Yokoyama M, and Iwasaka T (2010) Gene expression profiles and microsatellite instability in uterine corpus endometrioid adenocarcinoma. *J Obstet Gynaecol Res* 36(2): 336-343
- Lagarda H, Catusus L, Arguelles R, Matias-Guiu X, and Prat J (2001) K-ras mutations in endometrial carcinomas with microsatellite instability. *J Pathol* 193(2): 193-199
- Lax SF, Kendall B, Tashiro H, Slebos RJ, and Hedrick L (2000) The frequency of p53, K-ras mutations, and microsatellite instability differs in uterine endometrioid and serous carcinoma: evidence of distinct molecular genetic pathways. *Cancer* 88(4): 814-824
- MacDonald ND, Salvesen HB, Ryan A, Iversen OE, Akslen LA, and Jacobs IJ (2000) Frequency and prognostic impact of microsatellite instability in a large population-based study of endometrial carcinomas. *Cancer Res* 60(6): 1750-1752
- Machin P, Catusus L, Pons C, Munoz J, Matias-Guiu X, and Prat J (2002) CTNNB1 mutations and beta-catenin expression in endometrial carcinomas. *Hum Pathol* 33(2): 206-212
- Mackay HJ, Gallinger S, Tsao MS, McLachlin CM, Tu D, Keiser K, Eisenhauer EA, and Oza AM (2010) Prognostic value of microsatellite instability (MSI) and PTEN expression in women with endometrial cancer: results from studies of the NCIC Clinical Trials Group (NCIC CTG). *Eur J Cancer* 46(8): 1365-1373
- Maxwell GL, Risinger JI, Alvarez AA, Barrett JC, and Berchuck A (2001) Favorable survival associated with microsatellite instability in endometrioid endometrial cancers. *Obstet Gynecol* 97(3): 417-422

- Maxwell GL, Risinger JI, Hayes KA, Alvarez AA, Dodge RK, Barrett JC, and Berchuck A (2000) Racial disparity in the frequency of PTEN mutations, but not microsatellite instability, in advanced endometrial cancers. *Clin Cancer Res* 6(8): 2999-3005
- McCourt CK, Mutch DG, Gibb RK, Rader JS, Goodfellow PJ, Trinkaus K, and Powell MA (2007) Body mass index: relationship to clinical, pathologic and features of microsatellite instability in endometrial cancer. *Gynecol Oncol* 104(3): 535-539
- Miturski R, Bogusiewicz M, Tarkowski R, Ciotta C, Bignami M, Burnouf D, and Jakowicki JA (2003) BAT-26 microsatellite instability does not correlate with the loss of hMLH1 and hMSH2 protein expression in sporadic endometrial cancers. *Oncol Rep* 10(4): 1039-1043
- Moreno-Bueno G, Gamallo C, Perez-Gallego L, de Mora JC, Suarez A, and Palacios J (2001) beta-Catenin expression pattern, beta-catenin gene mutations, and microsatellite instability in endometrioid ovarian carcinomas and synchronous endometrial carcinomas. *Diagn Mol Pathol* 10(2): 116-122
- Moreno-Bueno G, Hardisson D, Sanchez C, Sarrio D, Cassia R, Garcia-Rostan G, Prat J, Guo M, Herman JG, Matias-Guiu X, et al (2002) Abnormalities of the APC/beta-catenin pathway in endometrial cancer. *Oncogene* 21(52): 7981-7990
- Murayama-Hosokawa S, Oda K, Nakagawa S, Ishikawa S, Yamamoto S, Shoji K, Ikeda Y, Uehara Y, Fukayama M, McCormick F, et al (2010) Genome-wide single-nucleotide polymorphism arrays in endometrial carcinomas associate extensive chromosomal instability with poor prognosis and unveil frequent chromosomal imbalances involved in the PI3-kinase pathway. *Oncogene* 29(13): 1897-1908
- Muresu R, Sini MC, Cossu A, Tore S, Balduin P, Manca A, Pisano M, Loddo C, Dessole S, Pintus A, et al (2002) Chromosomal abnormalities and microsatellite instability in sporadic endometrial cancer. *Eur J Cancer* 38(13): 1802-1809
- Mutter GL, Boynton KA, Faquin WC, Ruiz RE, and Jovanovic AS (1996) Allelotype mapping of unstable microsatellites establishes direct lineage continuity between endometrial precancers and cancer. *Cancer Res* 56(19): 4483-4486
- Ohwada M, Suzuki M, Kashiwagi H, Konishi F, and Sato I (1999) DNA replication error in endometrial carcinoma and complex atypical endometrial hyperplasia. *Cancer Genet Cytogenet* 114(2): 130-135
- Ohwada M, Suzuki M, Kohno T, Saga Y, Takei Y, Jobo T, Kuramoto H, and Sato I (2002) Involvement of microsatellite instability in lymph node metastasis of endometrial carcinoma. *Cancer Genet Cytogenet* 132(2): 152-155
- Peiffer SL, Herzog TJ, Tribune DJ, Mutch DG, Gersell DJ, and Goodfellow PJ (1995) Allelic loss of sequences from the long arm of chromosome 10 and replication errors in endometrial cancers. *Cancer Res* 55(9): 1922-1926
- Peiro G, Diebold J, Lohse P, Ruebsamen H, Baretton GB, and Lohrs U (2002) Microsatellite instability, loss of heterozygosity, and loss of hMLH1 and hMSH2 protein expression in endometrial carcinoma. *Hum Pathol* 33(3): 347-354
- Pijnenborg JM, Dam-de Veen GC, de Haan J, van Engeland M, and Groothuis PG (2004) Defective mismatch repair and the development of recurrent endometrial carcinoma. *Gynecol Oncol* 94(2): 550-559
- Prasad M, Wang H, Douglas W, Barakat RR, and Ellenson LH (2005) Molecular genetic characterization of tamoxifen-

- associated endometrial cancer. *Gynecol Oncol* 96(1): 25-31
- Risinger JI, Berchuck A, Kohler MF, Watson P, Lynch HT, and Boyd J (1993) Genetic instability of microsatellites in endometrial carcinoma. *Cancer Res* 53(21): 5100-5103
- Risinger JI, Hayes K, Maxwell GL, Carney ME, Dodge RK, Barrett JC, and Berchuck A (1998) PTEN mutation in endometrial cancers is associated with favorable clinical and pathologic characteristics. *Clin Cancer Res* 4(12): 3005-3010
- Risinger JI, Maxwell GL, Chandramouli GV, Aprelikova O, Litz T, Umar A, Berchuck A, and Barrett JC (2005) Gene expression profiling of microsatellite unstable and microsatellite stable endometrial cancers indicates distinct pathways of aberrant signaling. *Cancer Res* 65(12): 5031-5037
- Sakamoto T, Murase T, Urushibata H, Kato K, Takada H, Imamura T, Mori H, and Wake N (1998) Microsatellite instability and somatic mutations in endometrial carcinomas. *Gynecol Oncol* 71(1): 53-58
- Salvesen HB, MacDonald N, Ryan A, Jacobs IJ, Lynch ED, Akslen LA, and Das S (2001) PTEN methylation is associated with advanced stage and microsatellite instability in endometrial carcinoma. *Int J Cancer* 91(1): 22-26
- Shibata D, Mori Y, Cai K, Zhang L, Yin J, Elahi A, Hamelin R, Wong YF, Lo WK, Chung TK, et al (2006) RAB32 hypermethylation and microsatellite instability in gastric and endometrial adenocarcinomas. *Int J Cancer* 119(4): 801-806
- Sobczuk A, Romanowicz-Makowska H, Smolarz B, and Pertynski T (2007) Microsatellite instability (MSI) and MLH1 and MSH2 protein expression analysis in postmenopausal women with sporadic endometrial cancer. *J Exp Clin Cancer Res* 26(3): 369-374
- Stewart CJ, Amanuel B, Grieu F, Carrello A, and Iacopetta B (2010) KRAS mutation and microsatellite instability in endometrial adenocarcinomas showing MELF-type myometrial invasion. *J Clin Pathol* 63(7): 604-608
- Tashiro H, Lax SF, Gaudin PB, Isacson C, Cho KR, and Hedrick L (1997) Microsatellite instability is uncommon in uterine serous carcinoma. *Am J Pathol* 150(1): 75-79
- Taylor NP, Zigelboim I, Huettner PC, Powell MA, Gibb RK, Rader JS, Mutch DG, Edmonston TB, and Goodfellow PJ (2006) DNA mismatch repair and TP53 defects are early events in uterine carcinosarcoma tumorigenesis. *Mod Pathol* 19(10): 1333-1338
- Toda T, Oku H, Khaskhely NM, Moromizato H, Ono I, and Murata T (2001) Analysis of microsatellite instability and loss of heterozygosity in uterine endometrial adenocarcinoma. *Cancer Genet Cytogenet* 126(2): 120-127
- Turbiner J, Moreno-Bueno G, Dahiya S, Sanchez-Estevéz C, Hardisson D, Prat J, Oliva E, and Palacios J (2008) Clinicopathological and molecular analysis of endometrial carcinoma associated with tamoxifen. *Mod Pathol* 21(8): 925-936
- Watanabe Y, Nakajima H, Nozaki K, Ueda H, Obata K, Hoshiai H, and Noda K (2001) Clinicopathologic and immunohistochemical features and microsatellite status of endometrial cancer of the uterine isthmus. *Int J Gynecol Pathol* 20(4): 368-373
- Westin SN, Lacour RA, Urbauer DL, Luthra R, Bodurka DC, Lu KH, and Broaddus RR (2008) Carcinoma of the lower uterine segment: a newly described association with Lynch syndrome. *J Clin Oncol* 26(36): 5965-5971



- Zauber NP, Denehy TR, Taylor RR, Ongcapin EH, Marotta SP, Sabbath-Solitare M, Kulkarni R, Pradhan TS, Hermelin D, and Bishop DT (2010) Microsatellite instability and DNA methylation of endometrial tumors and clinical features in young women compared with older women. *Int J Gynecol Cancer* 20(9): 1549-1556
- Zigelboim I, Goodfellow PJ, Gao F, Gibb RK, Powell MA, Rader JS, and Mutch DG (2007) Microsatellite instability and epigenetic inactivation of MLH1 and outcome of patients with endometrial carcinomas of the endometrioid type. *J Clin Oncol* 25(15): 2042-2048
